# Supplementary material for: Smart supramolecular gels of enolizable amphiphilic glycosylfuran
Source: Royal Society of Chemistry journal article supplement (doi:10.1039/c9tb01480b), 2019-01-01
Supplement: c9tb01480b1.pdf [file c9tb01480b1.pdf]

## Supporting Information

### Smart Supramolecular Gels of Enolizable Amphiphilic Glycosylfuran

*Ayyapillai Tamizhanban,<sup>a</sup> Krishnamoorthy Lalitha,<sup>a</sup> Guru Prasanth Sarvepalli,<sup>a,b</sup> C. Uma Maheswari,<sup>a</sup> Vellaisamy Sridharan,<sup>c</sup> John Bosco Balaguru Rayappan,<sup>b</sup> and Subbiah Nagarajan<sup>\*a,d</sup>*

---

<sup>a</sup>Department of Chemistry, School of Chemical and Biotechnology, SASTRA Deemed University, Thanjavur – 613401, Tamil Nadu, India

<sup>b</sup>School of Electrical & Electronics Engineering, SASTRA Deemed University, Thanjavur – 613401, Tamil Nadu, India

<sup>c</sup>Department of Chemistry and Chemical Sciences, Central University of Jammu, Rahya-Suchani (Bagla), District-Samba, Jammu-181143, India.

<sup>d</sup>Department of Chemistry, National Institute of Technology Warangal, Warangal -506004, Telangana, India. E-mail: [snagarajan@nitw.ac.in](mailto:snagarajan@nitw.ac.in), [snrajannpt@gmail.com](mailto:snrajannpt@gmail.com)

---

### Table of Contents

|                                                                                                                                                |    |
|------------------------------------------------------------------------------------------------------------------------------------------------|----|
| <b>Table S1.</b> Optimization of reaction condition                                                                                            | 2  |
| <b>Table S2.</b> Solvents/Oils used for gelation studies                                                                                       | 2  |
| <b>Figure S1.</b> (a) NMR and Mass spectral studies.                                                                                           | 4  |
| <b>Figure S2.</b> Images of gel formed by compound <b>5g</b>                                                                                   | 5  |
| <b>Figure S3.</b> Optical microscopy image of (a-d) GH and (e-h) SGH respectively                                                              | 5  |
| <b>Figure S4.</b> FESEM image of (a-d) GH and (e-h) SGH respectively.                                                                          | 5  |
| <b>Figure S5.</b> FETEM image of (a-f) Crystalline structure in water under neutral pH by glycosylfuran, <b>5g</b> and (g,h) SGH respectively. | 6  |
| <b>Figure S6.</b> FTIR spectra of compound <b>5a-g</b>                                                                                         | 6  |
| <b>Figure S7.</b> (a-f) XPS spectra of xerogel formed by GH and SGH                                                                            | 7  |
| <b>Figure S8-S23.</b> NMR spectra                                                                                                              | 8  |
| <b>Figure S24.</b> H <sub>2</sub> S interaction/sensing studies                                                                                | 16 |

**Table S1.** Optimization of reaction condition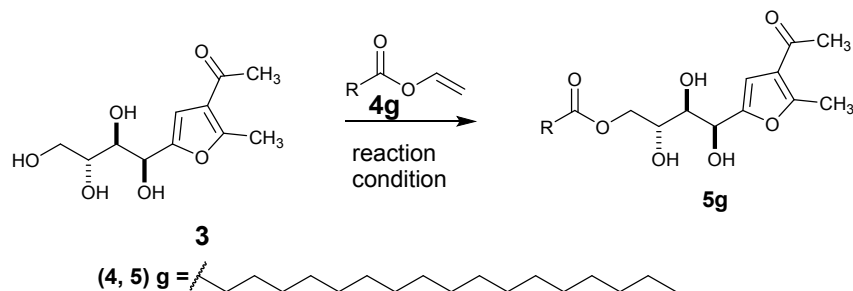

| S. No | Solvent          | Temperature (°C) | Time (h) | Yield (%) <sup>s</sup> |
|-------|------------------|------------------|----------|------------------------|
| 1     | Dioxane          | 50               | 24       | NR                     |
| 2     | Acetone          | 50               | 24       | 54                     |
| 3     | Acetonitrile     | 50               | 24       | 35                     |
| 4     | Isopropanol      | 50               | 24       | 38                     |
| 5     | <i>t</i> -BuOH   | 50               | 24       | 23                     |
| 6     | DMSO             | 50               | 24       | Trace <sup>#</sup>     |
| 7     | H <sub>2</sub> O | 50               | 24       | Trace <sup>#</sup>     |
| 8     | DCM              | 50               | 24       | Trace <sup>#</sup>     |
| 9     | DMF              | 50               | 24       | Trace <sup>#</sup>     |
| 10    | Toluene          | 50               | 24       | 10                     |
| 11    | Acetone          | 60               | 24       | 47                     |
| 12    | Acetone          | 70               | 24       | Trace <sup>#</sup>     |
| 13    | Acetone          | 50               | 48       | 78                     |
| 14    | Acetone          | 50               | 60       | 83                     |
| 15    | Acetone          | 50               | 72       | 79                     |

Note: Reactions performed at <50 °C did not furnish the corresponding product in good yield, hence not shown in the optimization table. <sup>#</sup>observed trace product in TLC. <sup>s</sup>isolated yield after column chromatography.

**Table S2.** Solvents/Oils used for gelation studies

| S. No. | Solvent/vegetable oils | Observation Critical Gel Concentration (CGC wt/v% ) |    |    |    |    |    |    |
|--------|------------------------|-----------------------------------------------------|----|----|----|----|----|----|
|        |                        | 5a                                                  | 5b | 5c | 5d | 5e | 5f | 5g |
| 1      | Ethanol                | S                                                   | S  | S  | S  | S  | S  | S  |
| 2      | <i>n</i> -Butanol      | S                                                   | S  | S  | S  | S  | S  | S  |

|    |                               |   |    |   |      |       |       |         |
|----|-------------------------------|---|----|---|------|-------|-------|---------|
| 3  | Octanol                       | S | S  | S | S    | S     | S     | S       |
| 4  | Decanol                       | S | S  | S | S    | S     | S     | S       |
| 5  | Dodecanol                     | S | S  | S | S    | S     | S     | S       |
| 6  | Toluene                       | S | S  | S | S    | S     | S     | PG      |
| 7  | Benzene                       | S | S  | S | S    | S     | S     | S       |
| 8  | Diesel                        | S | S  | S | S    | S     | S     | S       |
| 9  | 1,2-Dichlorobenzene           | S | S  | S | S    | S     | PG    | G       |
| 10 | Chloroform                    | S | S  | S | S    | S     | S     | S       |
| 11 | Hazelnut oil                  | S | S  | S | PG   | G (1) | G (1) | G(0.7)  |
| 12 | Olive oil                     | S | PG | S | PG   | G (1) | G (1) | G(0.8)  |
| 13 | Heavy paraffin oil            | S | PG | S | G(1) | G (1) | G (1) | G(0.6)  |
| 14 | Light paraffin oil            | S | S  | S | PG   | PG    | PG    | G (1)   |
| 15 | Sesame oil                    | S | S  | S | PG   | PG    | PG    | PG      |
| 16 | Linseed oil                   | S | S  | S | PG   | PG    | G (1) | G (0.6) |
| 17 | H <sub>2</sub> O              | I | P  | P | P    | Crys  | Crys  | Crys    |
| 18 | DMSO+ H <sub>2</sub> O (1:9)* | S | P  | S | P    | P     | PG    | G (1)   |
| 19 | DMF+ H <sub>2</sub> O (1:1)   | S | P  | S | P    | P     | PG    | PG      |
| 20 | Ethylacetate                  | S | S  | S | S    | S     | S     | S       |
| 21 | Cyclohexane                   | S | S  | S | S    | S     | S     | S       |
| 22 | EPALO                         | S | S  | S | S    | S     | PG    | G (1)   |
| 23 | Castor oil                    | S | S  | S | S    | S     | S     | PG      |

\* Self-sorting gel under basic pH was observed even without using heating cooling cycle

## NMR and mass spectral analysis

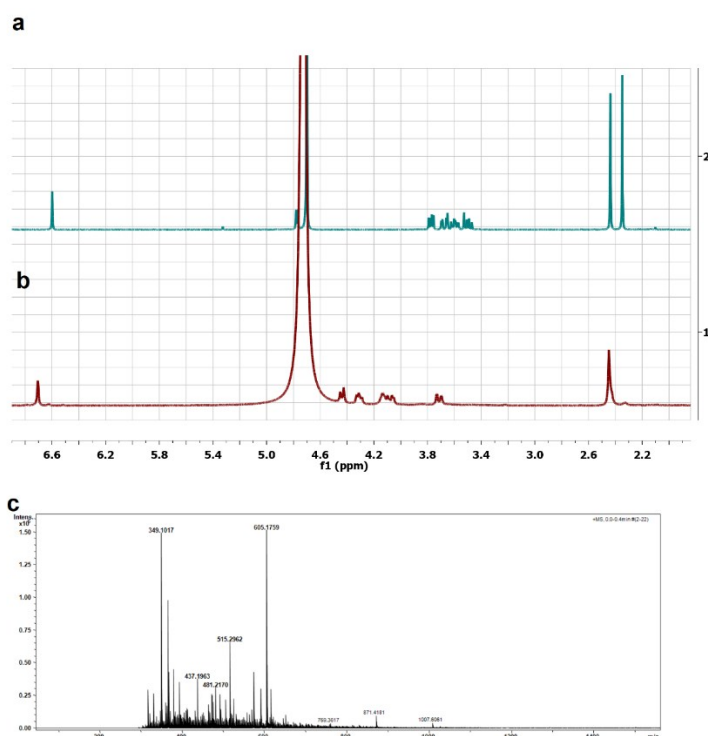

The addition of freshly prepared 1 wt/v%  $\text{Na}_2\text{S}$  solution into the solution of **5g** (1 wt/v%) dramatically accelerate the gelation process by encapsulating  $\text{Na}_2\text{S}$  and  $\text{H}_2\text{S}$  via the intermolecular interactions. Xerogel obtained from SGH is subjected to the mass spectral analysis. Mass spectral data reveals the enolization of **5g** along with the strongly interacted  $\text{H}_2\text{O}$  and  $\text{Na}_2\text{S}$  in xerogel state. Exact mass calculated for  $\text{C}_{29}\text{H}_{51}\text{Na}_2\text{O}_8\text{S}$   $m/z = 605.3100$ ; found  $m/z = 605.1759$

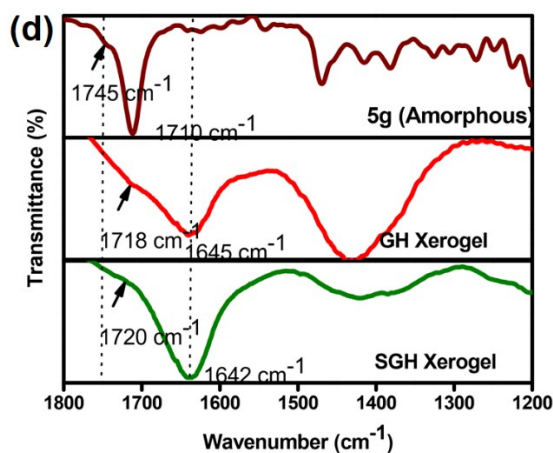

**Figure S1.** (a)  $^1\text{H}$  NMR spectra of compound **3** in  $\text{D}_2\text{O}$ ; (b)  $^1\text{H}$  NMR spectra of compound **3** in  $\text{D}_2\text{O} + \text{NaOH}$  1wt/v%; (c) Mass spectra of xerogel of SGH in MeOH and (d) FTIR spectral comparison of **5g** in amorphous state, GH xerogel and SGH xerogel.

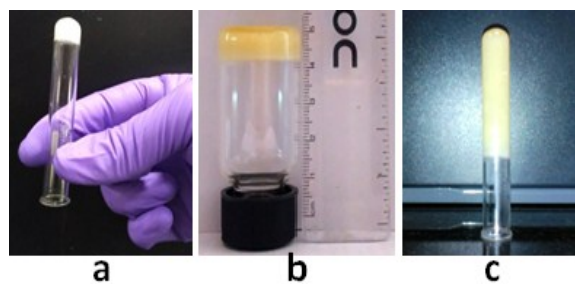

**Figure S2.** Images of gel formed by compound **5g** in a) 1 wt/v% of  $\text{Na}_2\text{S}$  under self-sorting condition (SGH); b) 1 wt/v% of  $\text{NaOH}$  under self-sorting condition (GH); c) 1 wt/v% of  $\text{Na}_2\text{S}$  under the influence of heating cooling cycle.

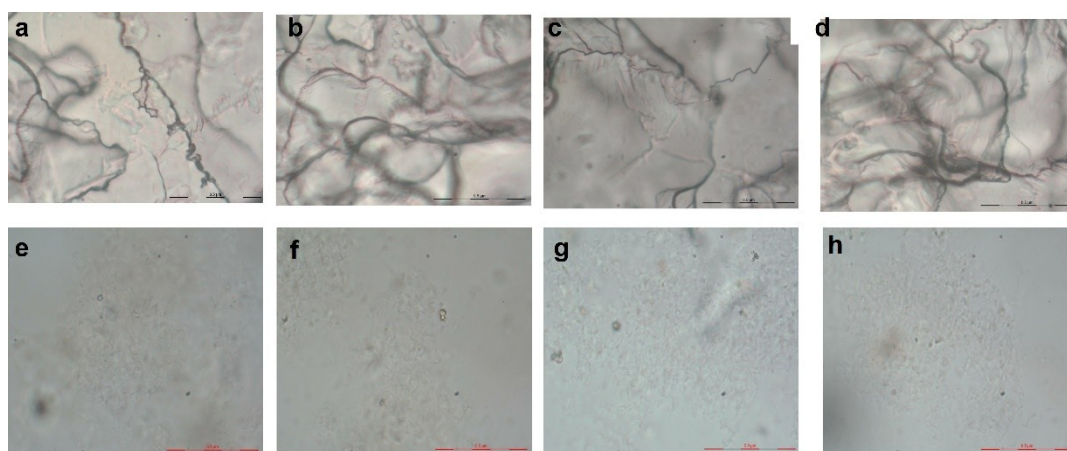

**Figure S3.** Optical microscopy image of (a-d) GH and (e-h) SGH respectively

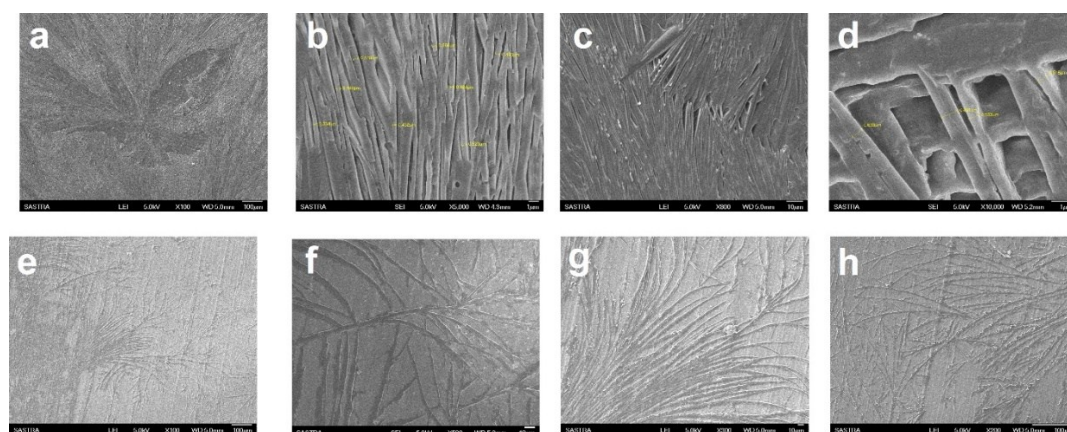

**Figure S4** FESEM image of (a-d) GH and (e-h) SGH respectively.

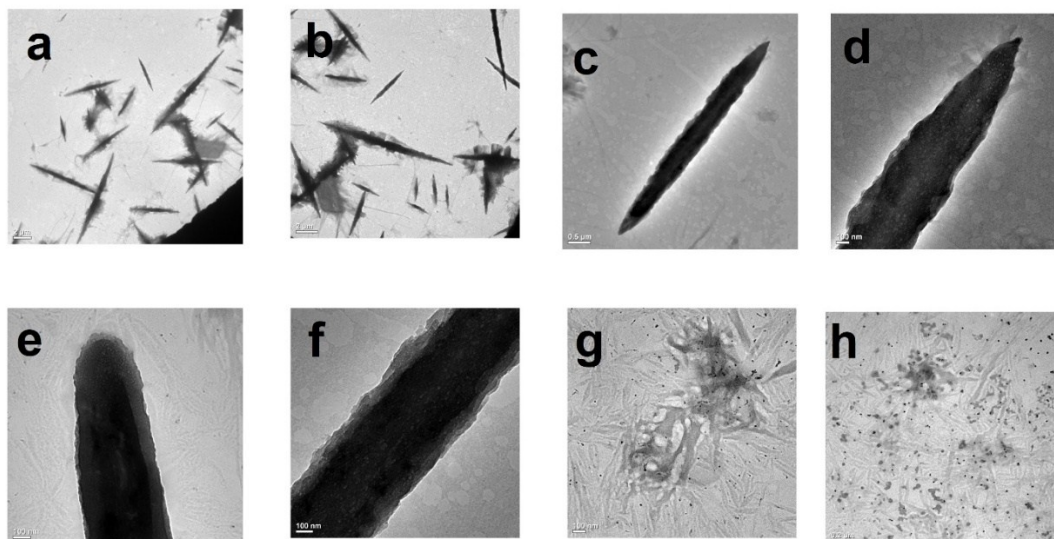

**Figure S5** FETEM image of (a-f) Crystalline structure in water under neutral pH by glycosylfuran, 5g and (g,h) SGH respectively.

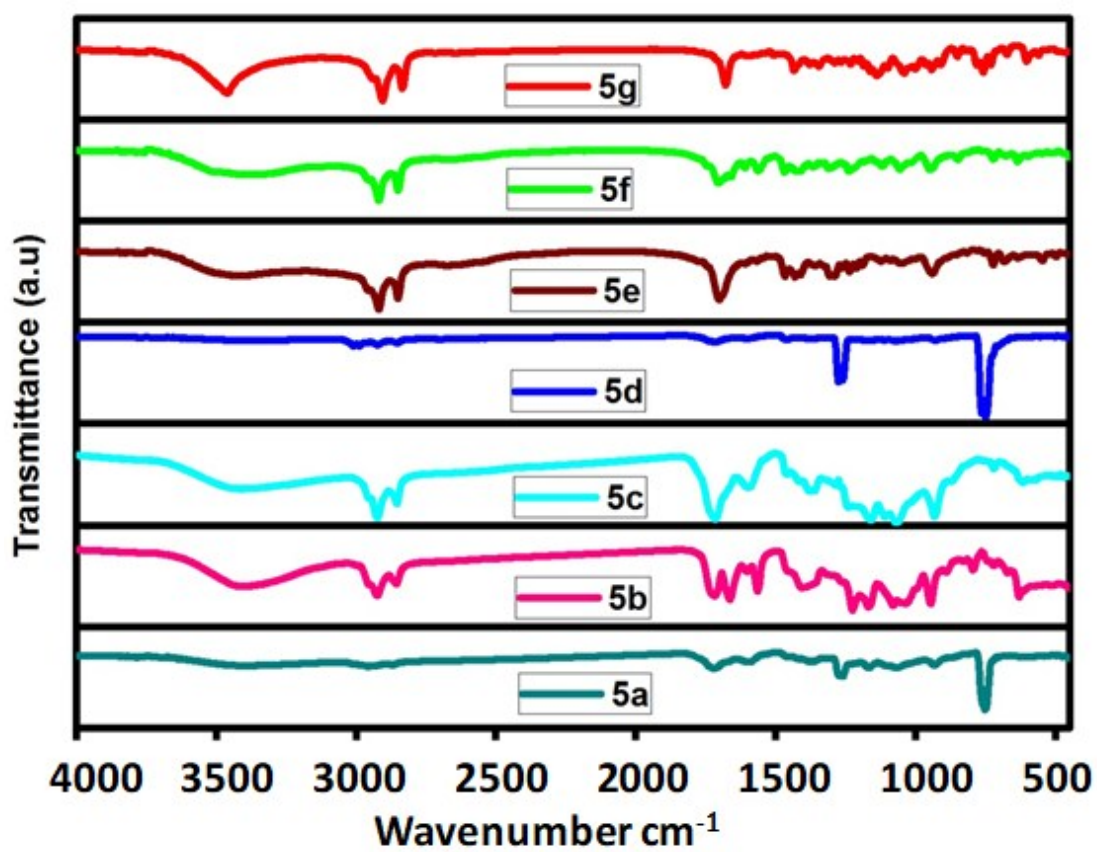

**Figure S6** FTIR spectra of compound 5a-g

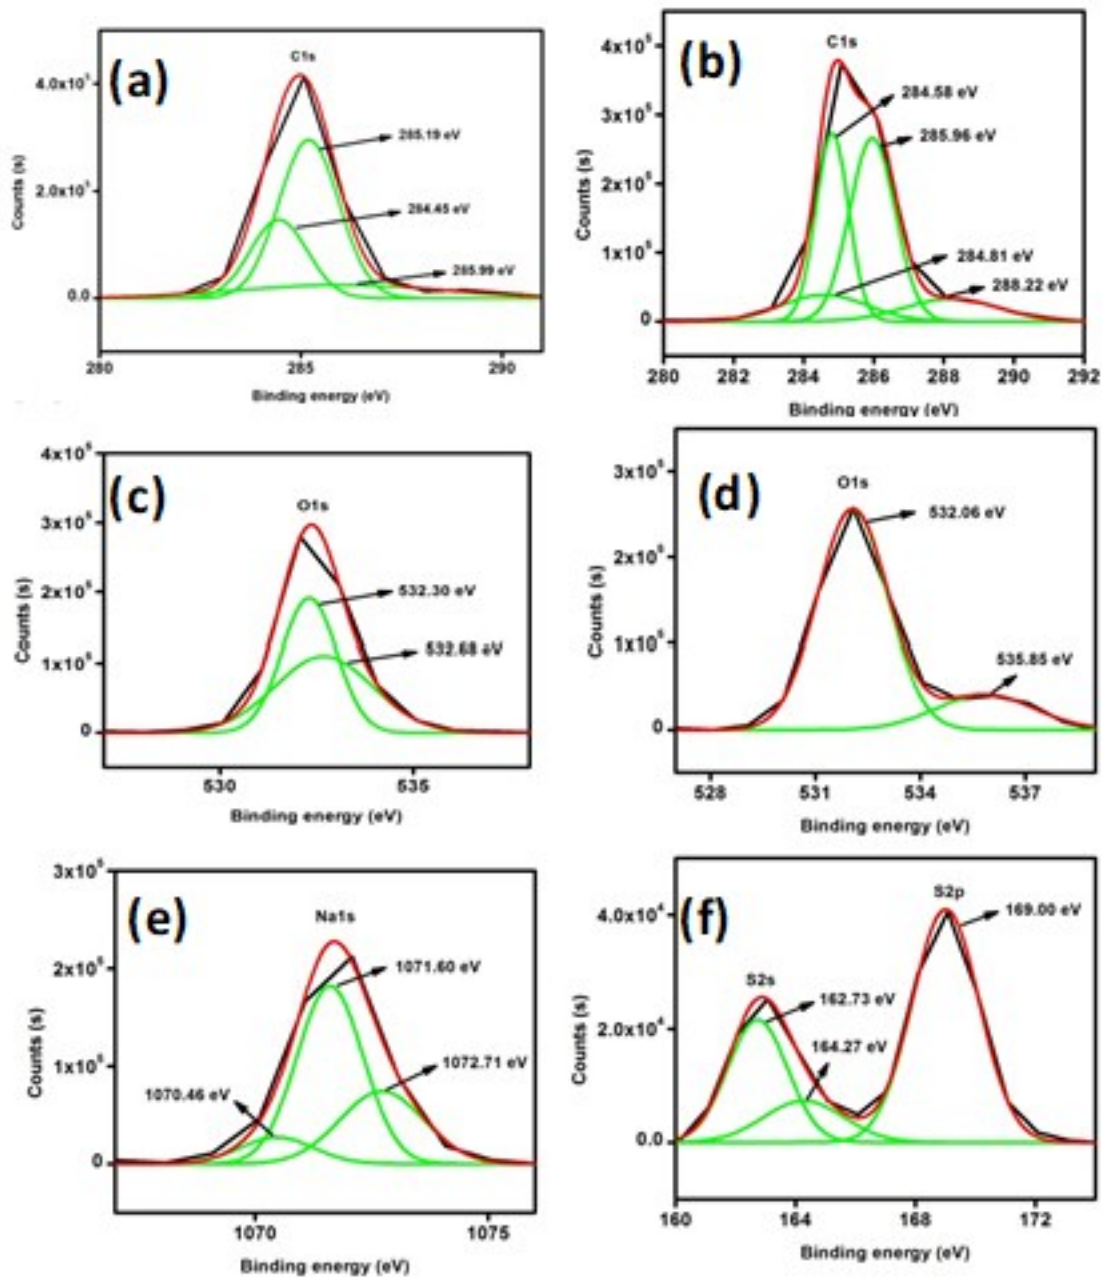

**Figure S7.** (a-f) XPS spectra of xerogel formed by GH and SGH

## NMR spectra

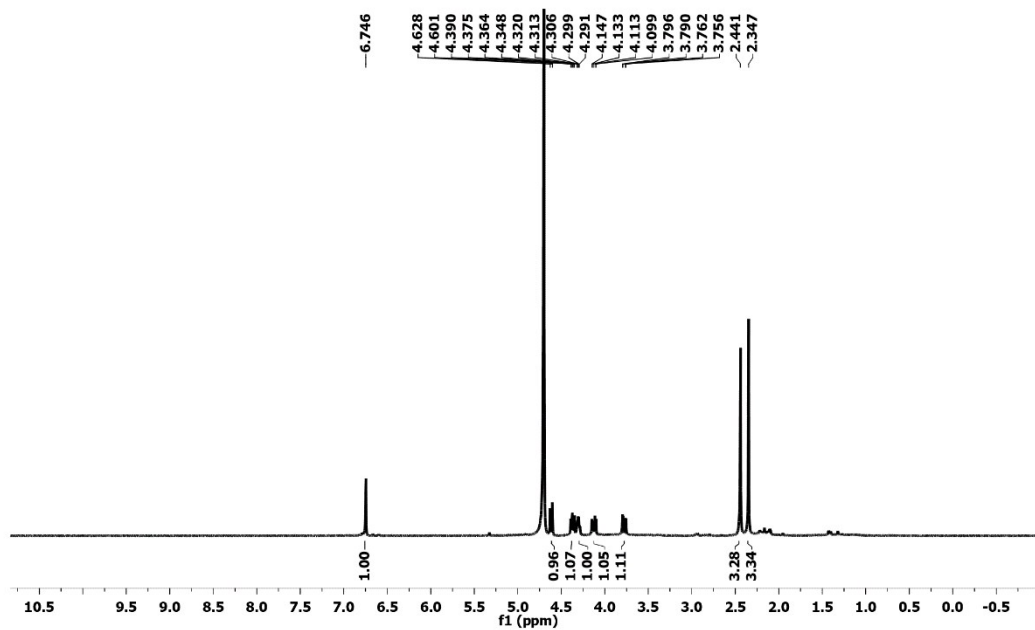

Figure S8.  $^1\text{H}$  NMR of compound, **3** in  $\text{D}_2\text{O}$

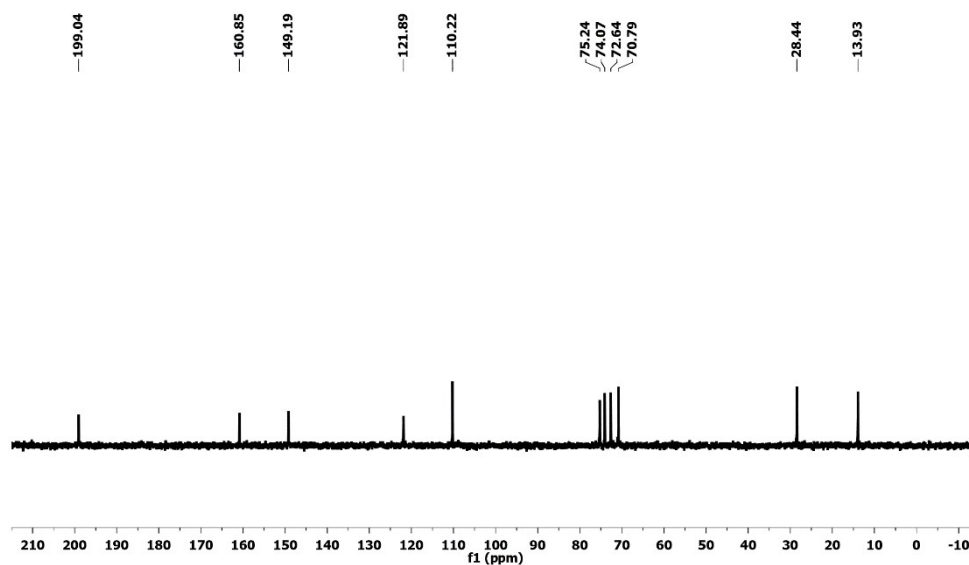

Figure S9.  $^{13}\text{C}$  NMR of compound, **3** in  $\text{D}_2\text{O}$



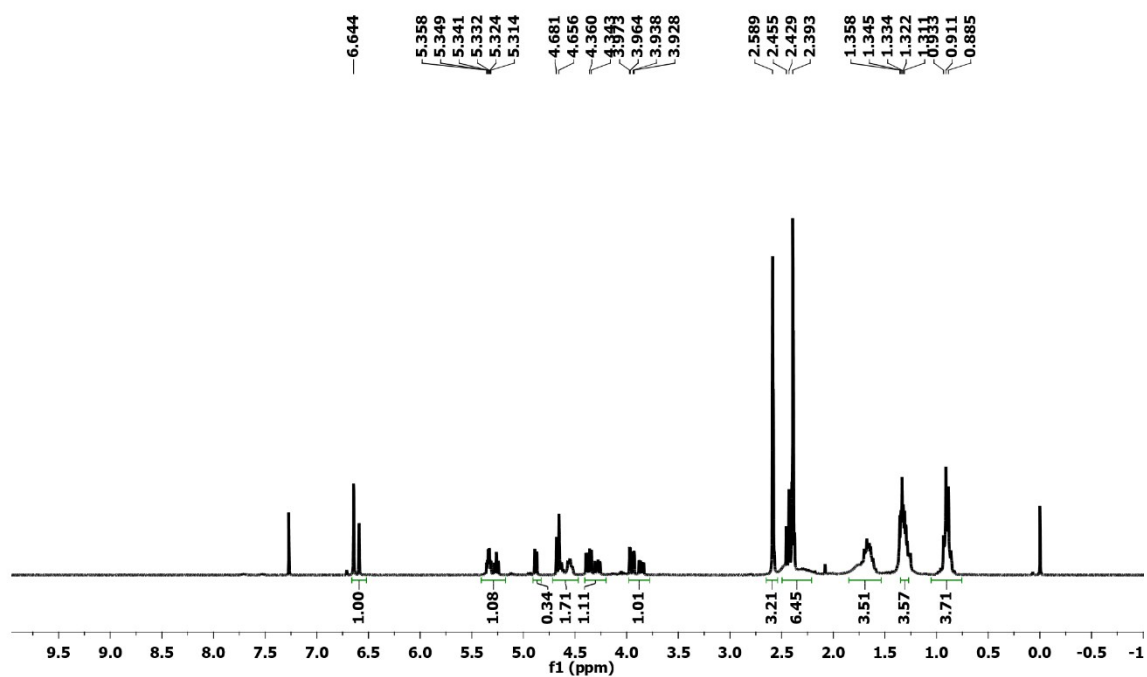

Figure S10.  $^1\text{H}$  NMR of compound, **5a** in  $\text{CDCl}_3$

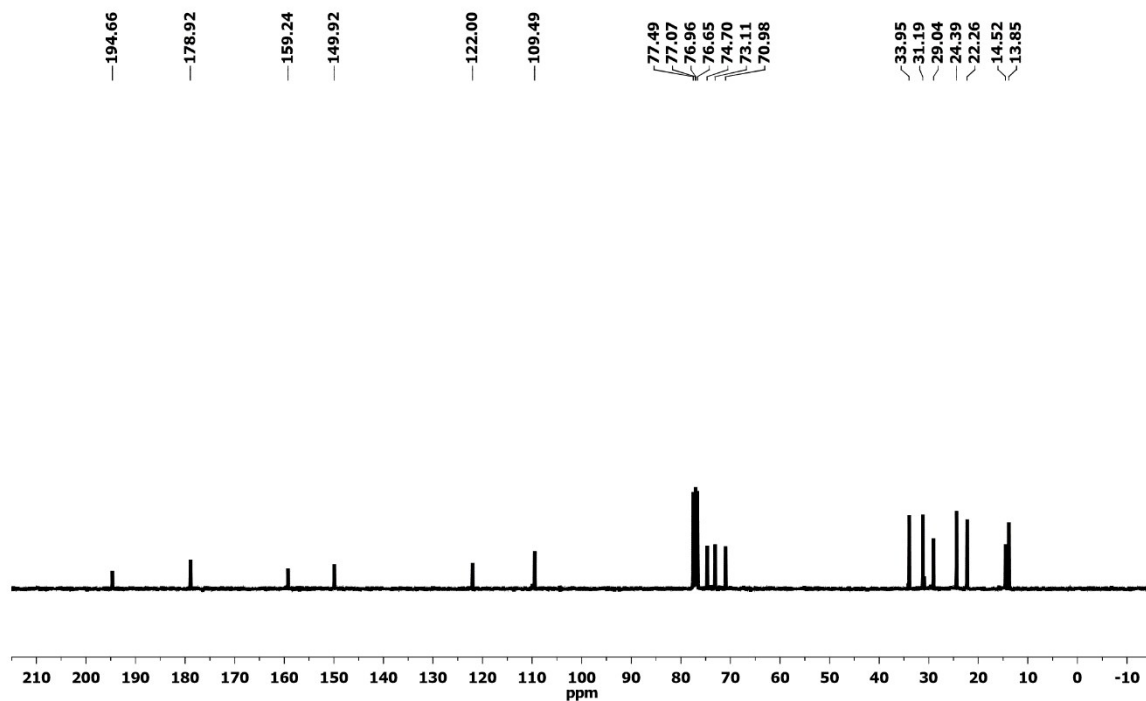

Figure S11.  $^{13}\text{C}$  NMR of compound, **5a** in  $\text{CDCl}_3$

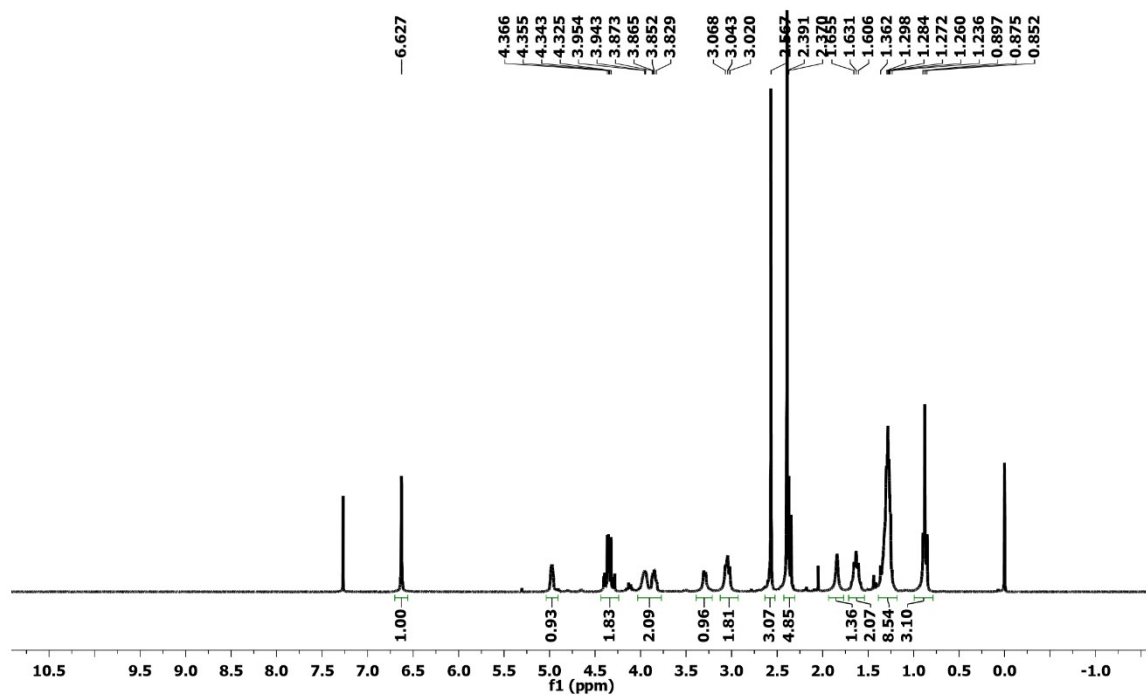

Figure S12.  $^1\text{H}$  NMR of compound, **5b** in  $\text{CDCl}_3$

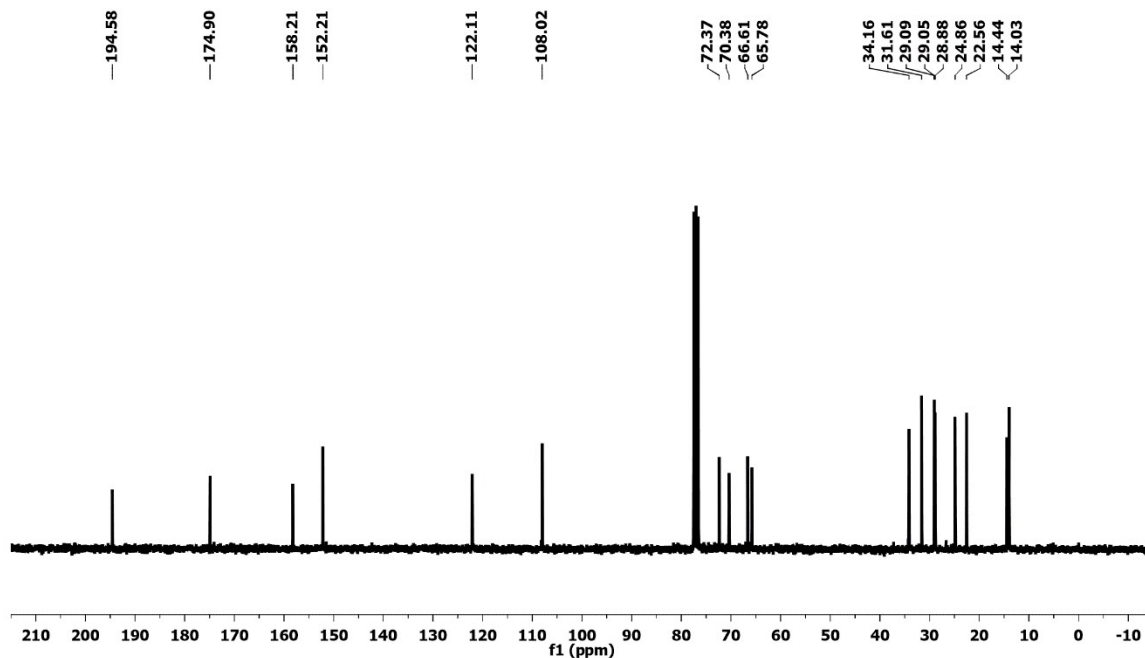

Figure S13.  $^{13}\text{C}$  NMR of compound, **5b** in  $\text{CDCl}_3$

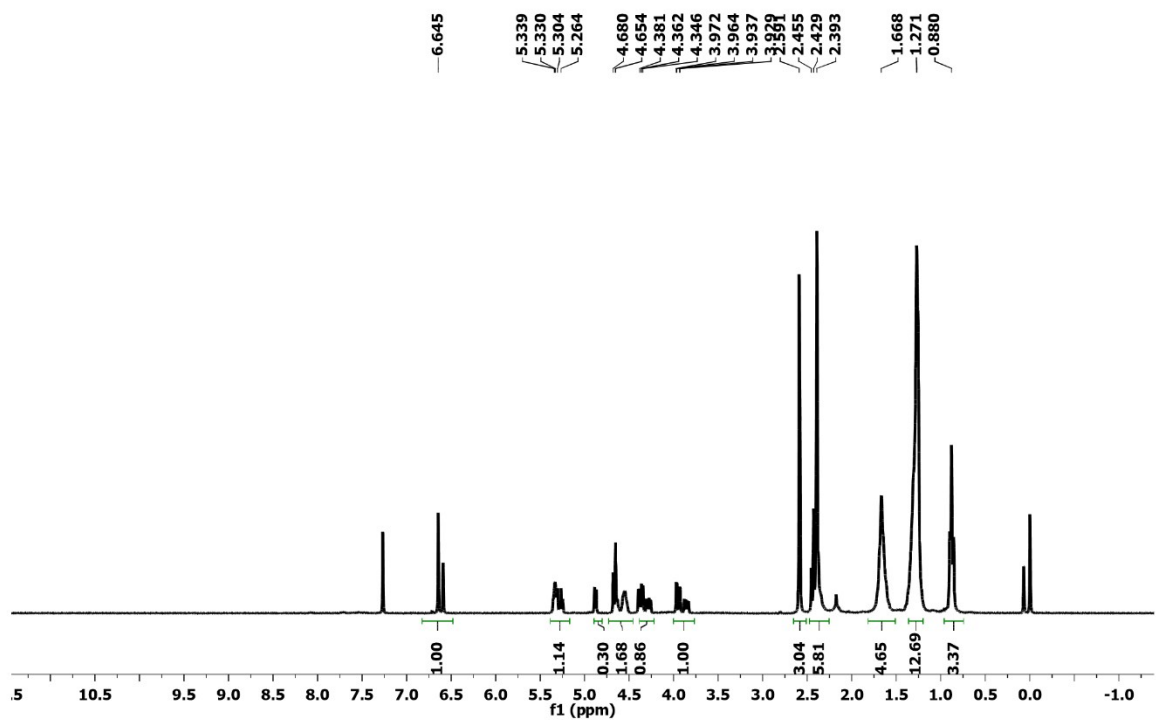

Figure S14.  $^1\text{H}$  NMR of compound, **5c** in  $\text{CDCl}_3$

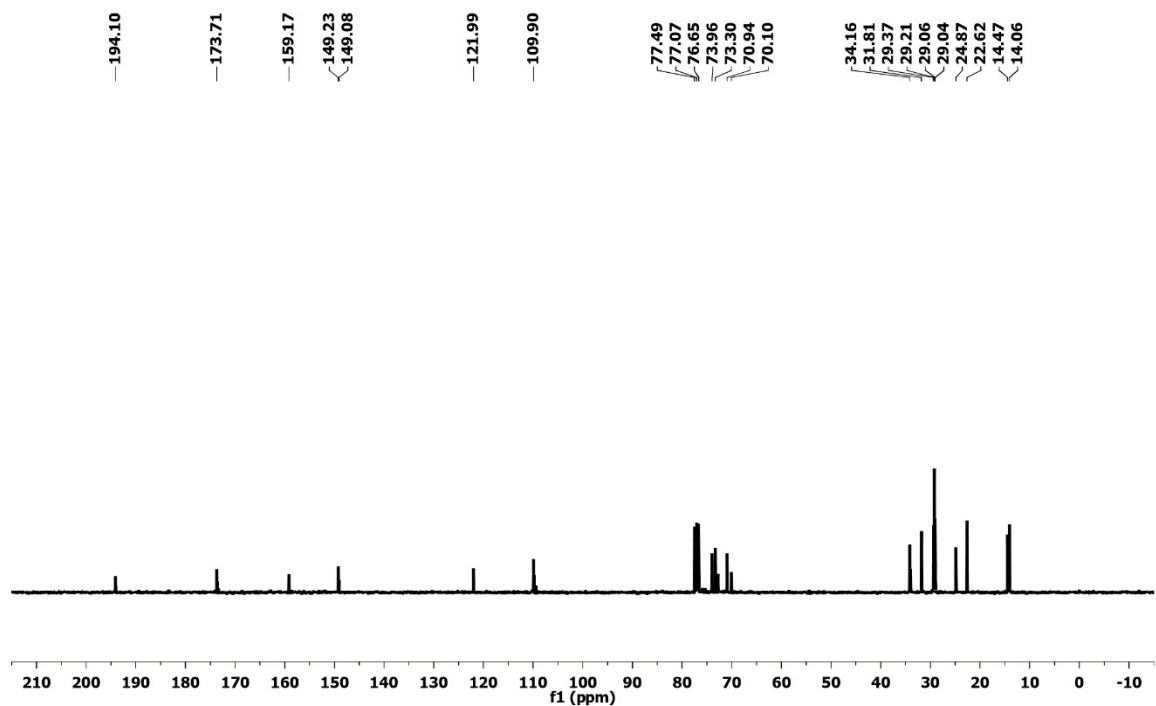

Figure S15.  $^{13}\text{C}$  NMR of compound, **5c** in  $\text{CDCl}_3$

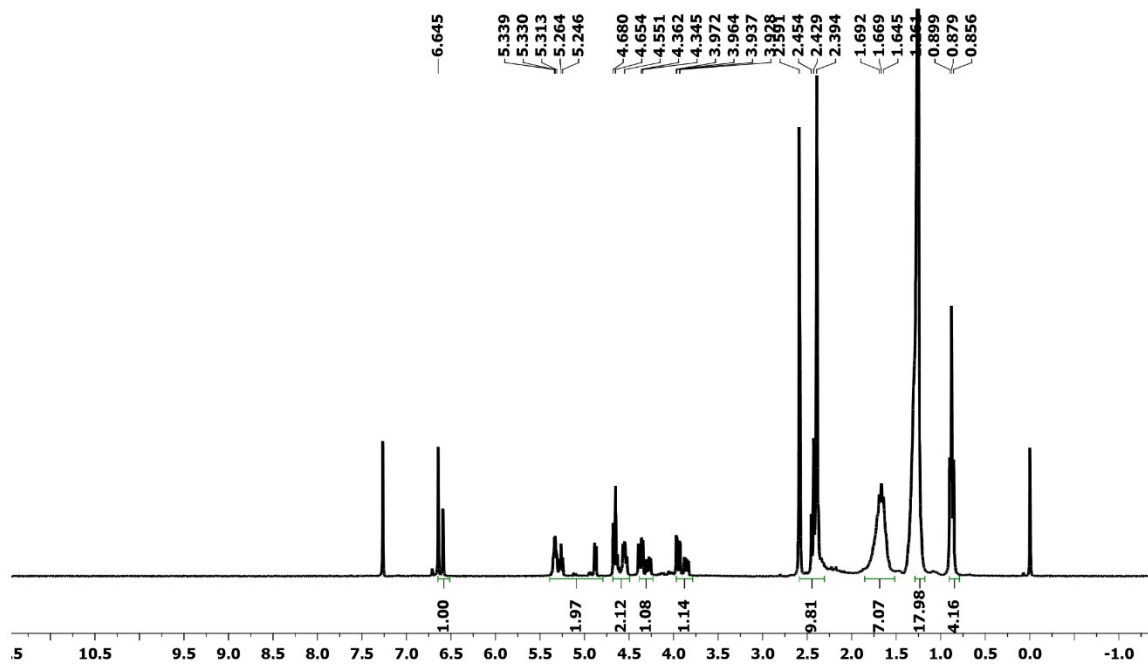

Figure S16.  $^1\text{H}$  NMR of compound, **5d** in  $\text{CDCl}_3$

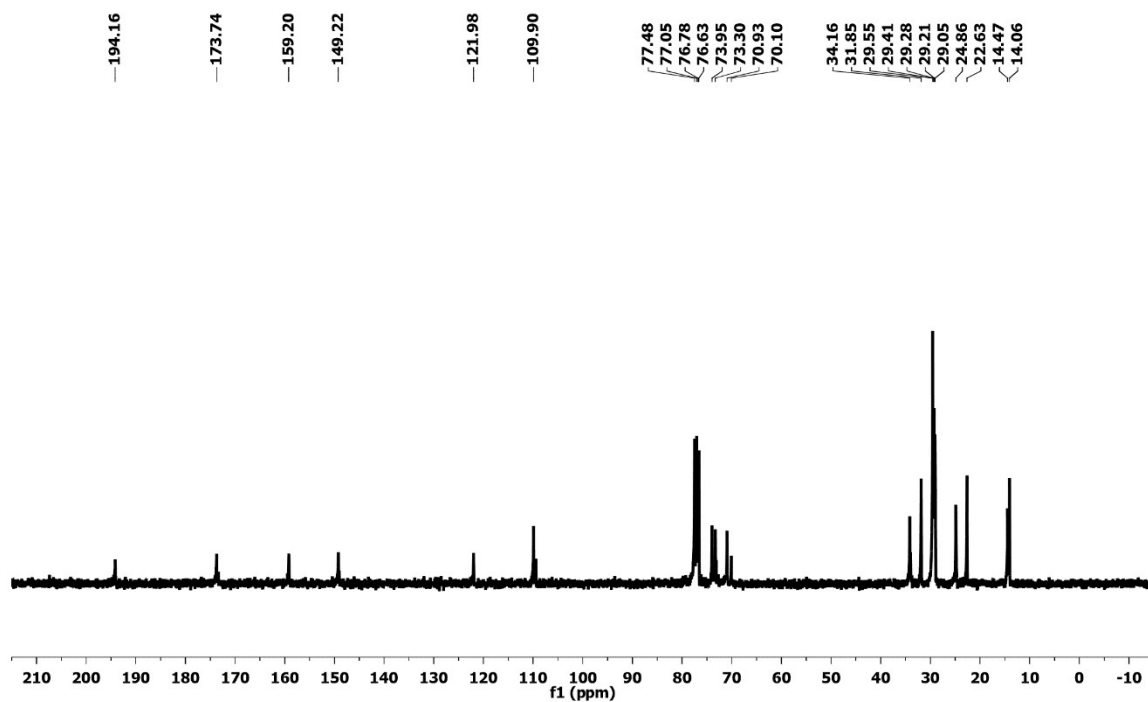

Figure S17.  $^{13}\text{C}$  NMR of compound, **5d** in  $\text{CDCl}_3$

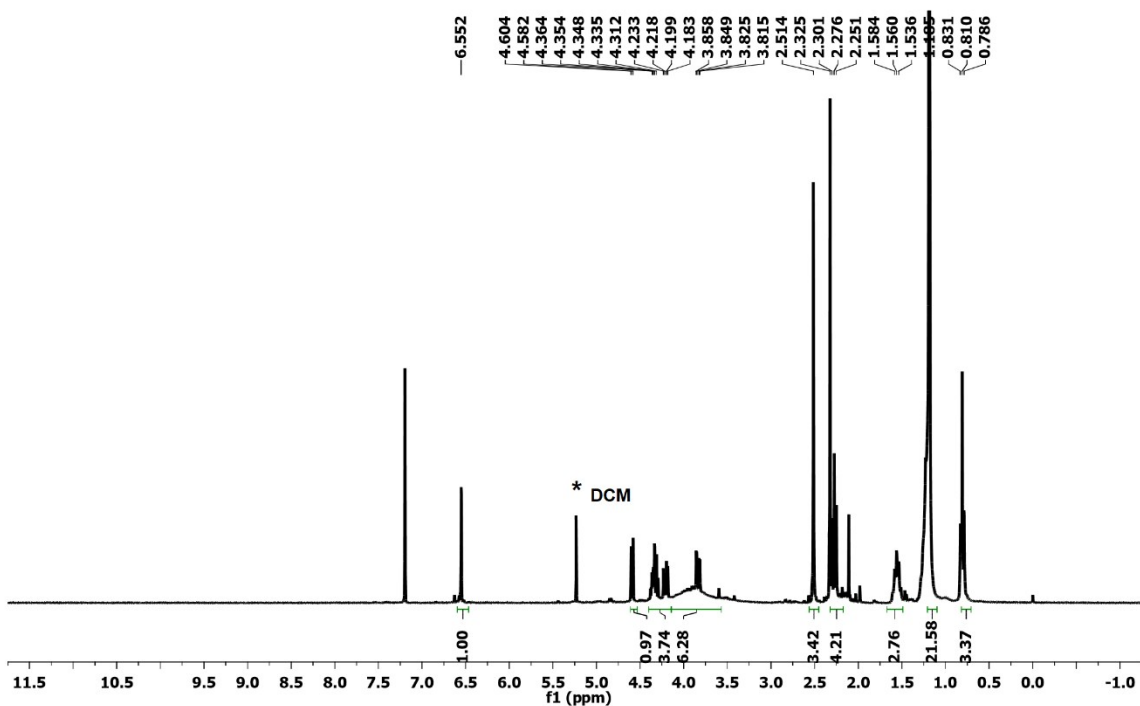

Figure S18.  $^1\text{H}$  NMR of compound, **5e** in  $\text{CDCl}_3$

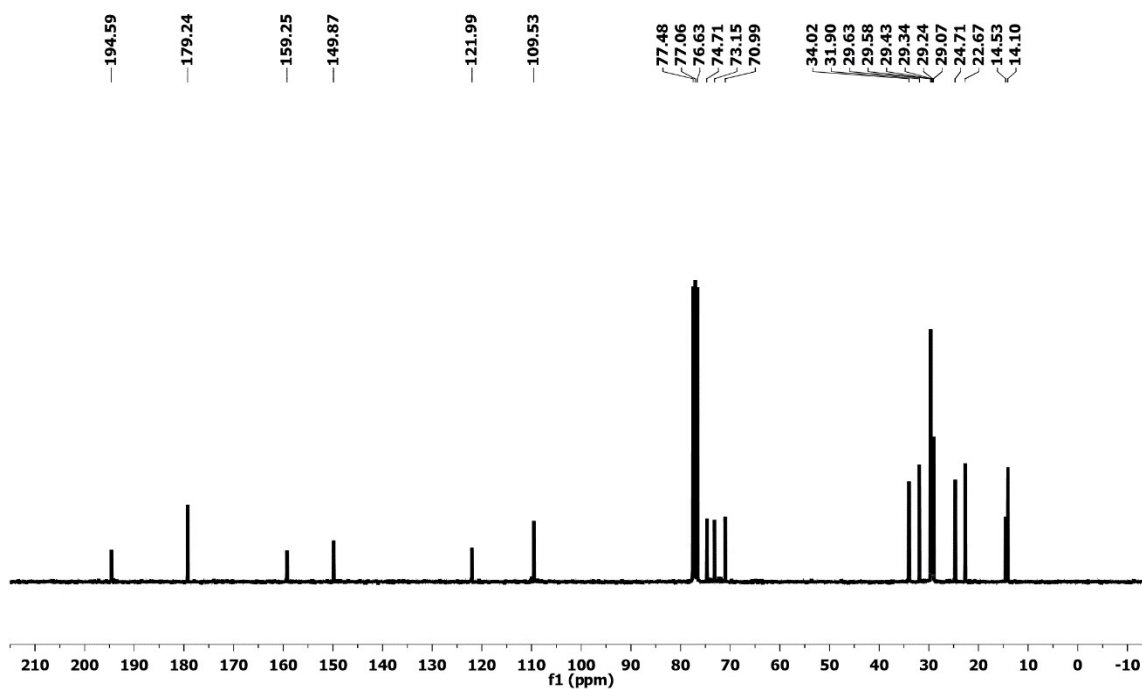

Figure S19.  $^{13}\text{C}$  NMR of compound, **5e** in  $\text{CDCl}_3$

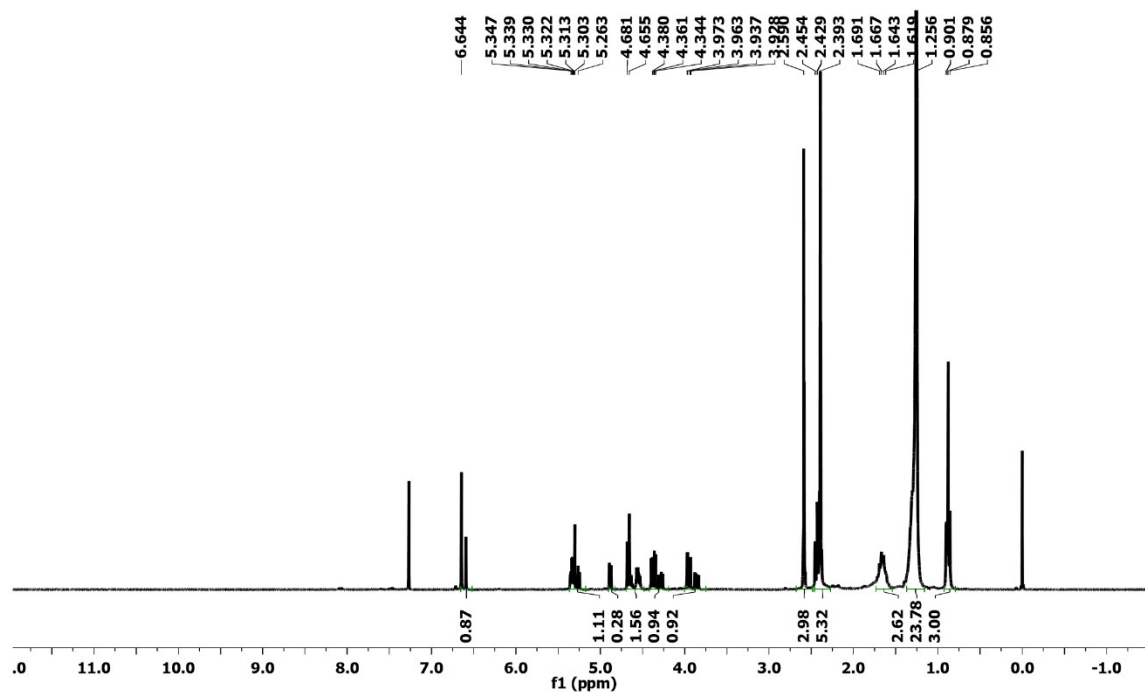

Figure S20.  $^1\text{H}$  NMR of compound, **5f** in  $\text{CDCl}_3$  at 300 K

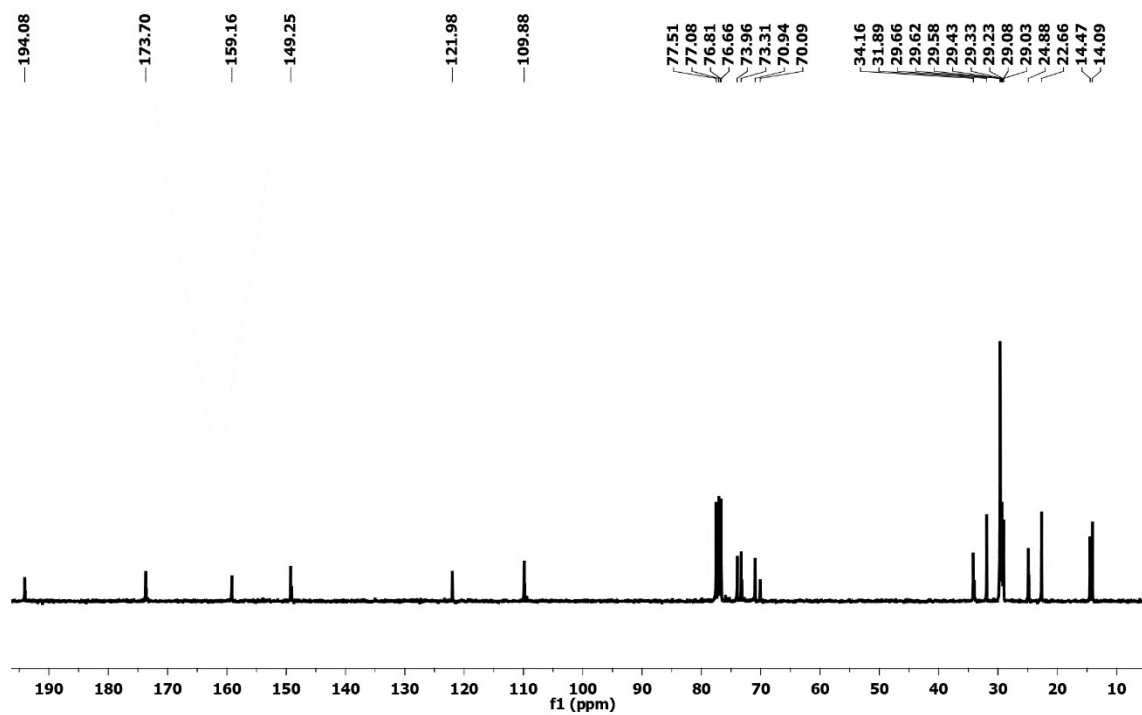

Figure S21.  $^{13}\text{C}$  NMR of compound, **5f** in  $\text{CDCl}_3$  at 300 K

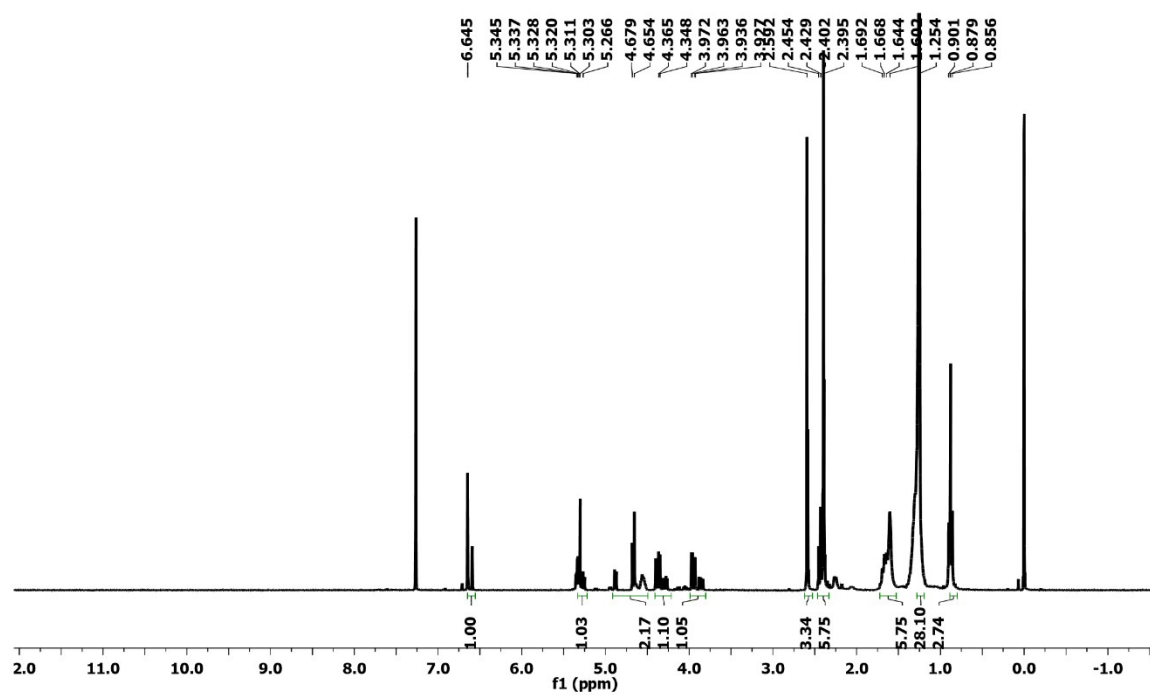

Figure S22.  $^1\text{H}$  NMR of compound, **5g** in  $\text{CDCl}_3$

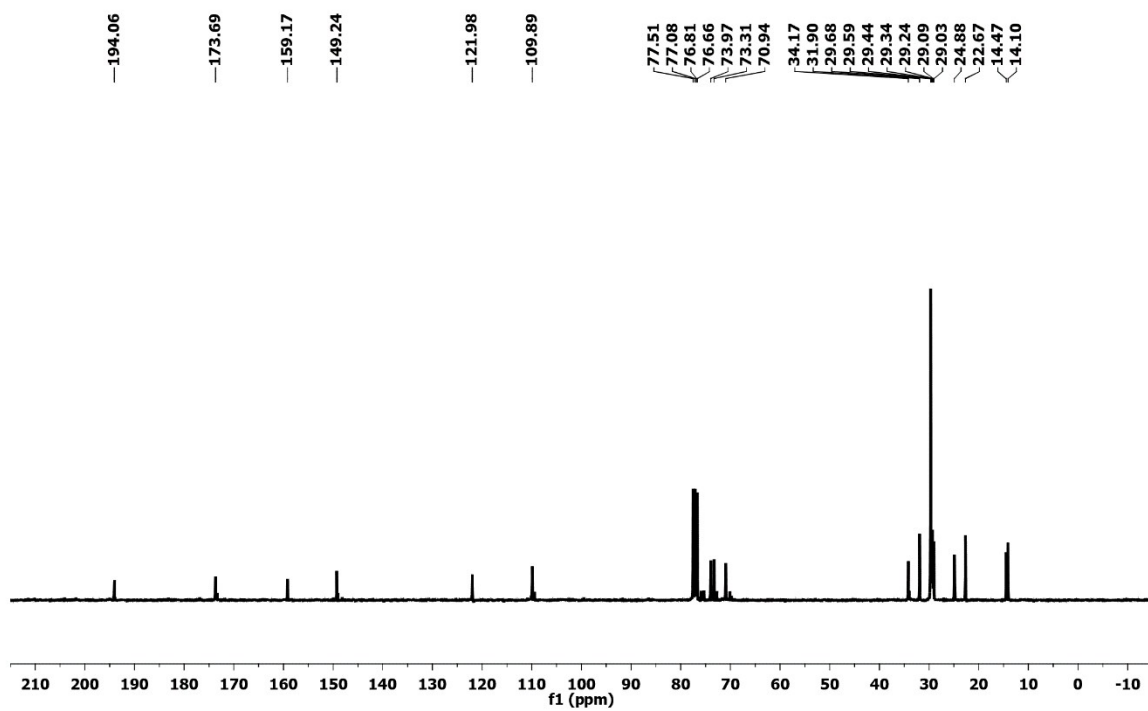

Figure S23.  $^{13}\text{C}$  NMR of compound, **5g** in  $\text{CDCl}_3$

## H<sub>2</sub>S interaction/sensing studies

The sensing response H<sub>2</sub>S generated from Na<sub>2</sub>S has been calculated using the equation,  $S = R_a/R_g$ , where  $R_a$  represents the resistance at the ambient atmosphere and  $R_g$  is the resistance of the sensing element in the presence of the target gas.

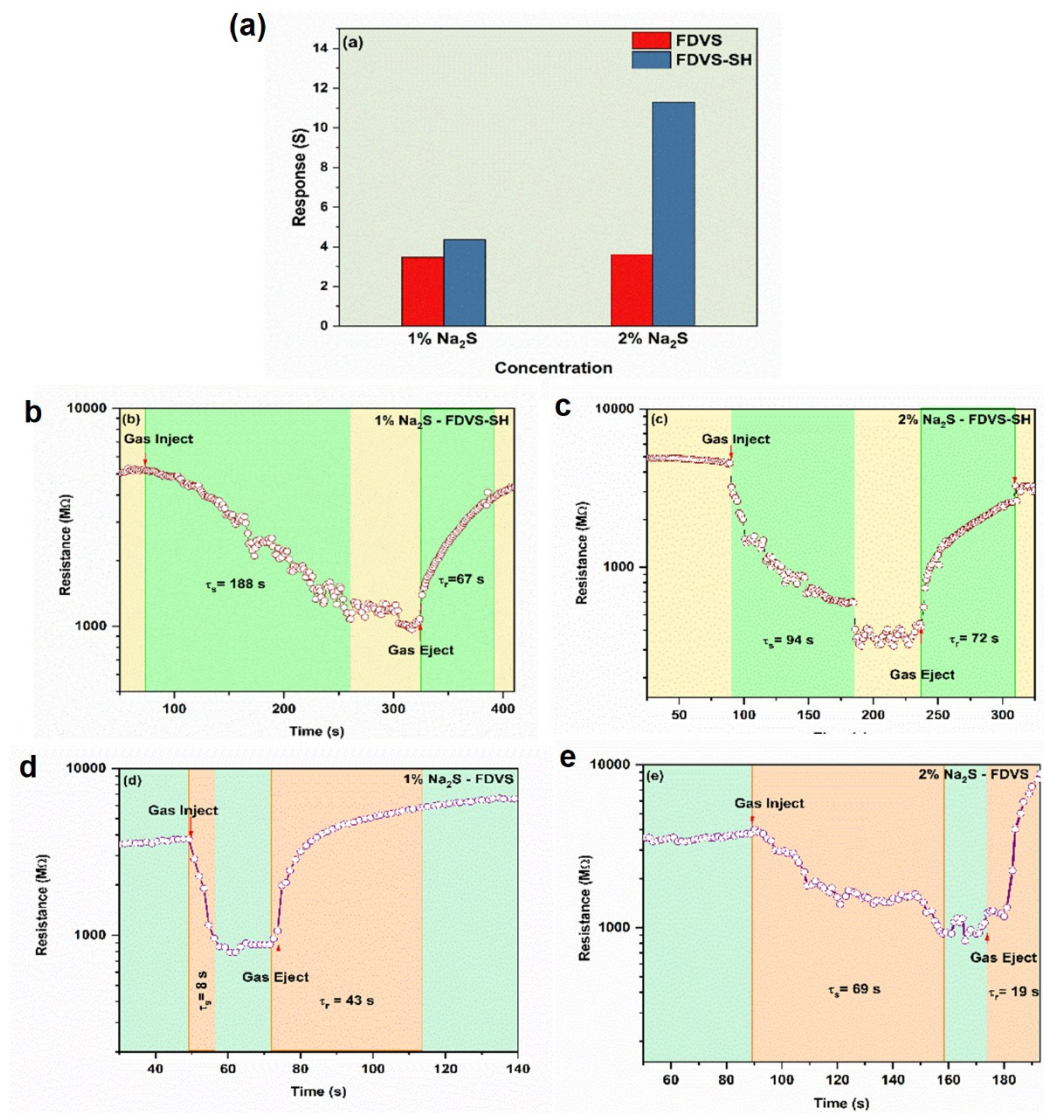

**Figure S24.** (a) representation of H<sub>2</sub>S Sensing characteristics of **5g** in amorphous state (red) and xerogel of GH in assembled state (blue) towards 1% and 2% of Na<sub>2</sub>S concentration. (b-e) shows the transient responses GH & amorphous 5g sensing elements towards 1% and 2% of Na<sub>2</sub>S concentration dissolved in water.
